# Supplementary material for: Surface photovoltage dynamics at passivated silicon surfaces: influence of substrate doping and surface termination
Source: Royal Society of Chemistry journal article supplement (doi:10.1039/d1fd00107h), 2022-01-01
Supplement: d1fd00107h1.pdf [file d1fd00107h1.pdf]

## Surface Photovoltage dynamics at passivated silicon surfaces: influence of substrate doping and surface termination

Debora Pierucci<sup>1,2,3</sup>, Mathieu G. Silly<sup>1</sup>, Heloise Tissot<sup>1,2,5</sup>, Philippe Hollander<sup>1</sup>, Fausto Sirotti<sup>1,4</sup>, and Francois Rochet<sup>2</sup>

- 1) Synchrotron SOLEIL, L'Orme des Merisiers, Saint-Aubin, BP 48, F-91192 Gif-sur-Yvette, France
- 2) Sorbonne Universités, UPMC Univ. Paris 06, and CNRS UMR 7614, Laboratoire de Chimie Physique Matière et Rayonnement (LCPMR), F-75005, Paris, France.
- 3) Now at Université Paris-Saclay, CNRS, Centre de Nanosciences et de Nanotechnologies, 91120, Palaiseau, Paris, France
- 4) Now at Physique de la Matière Condensée, CNRS and Ecole Polytechnique, IP Paris, F-91128 Palaiseau, France
- 5) Now at Aix-Marseille Univ, CNRS, CINaM, Marseille, France

### I. SUPPLEMENTARY MATERIAL

The spectra measured in fixed mode before and after the SPV versus Fluence experiment are reported in Figure S1. The components are slightly broader, in particular the lower kinetic energy peak is less visible and the background slightly higher. The slight modification in shape comes from the interaction of the synchrotron beam with the surface which can affect the order of the surface.

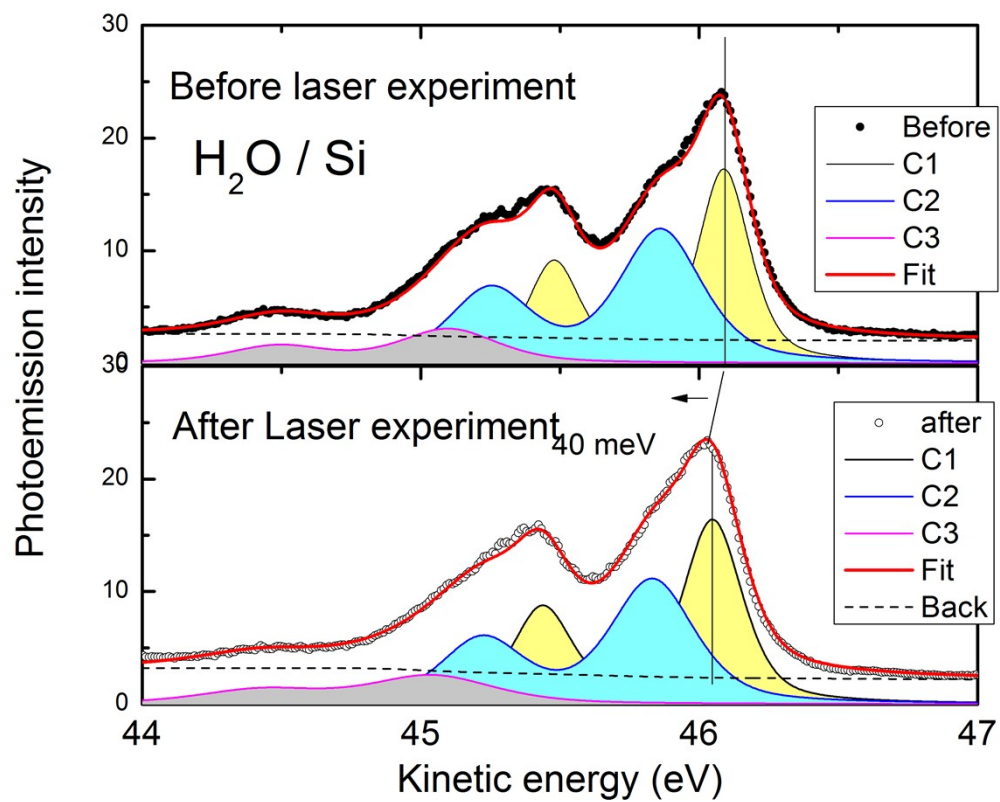

Figure S1: Comparison of fixed spectra measured on the n doped water saturated surface before and after the SPV experiment as a function of the laser fluence.
